# Supplementary material for: SARS-CoV-2 B.1.617.2 Delta variant replication and immune evasion
Source: PubMed Central journal article supplement (PMC8566220; doi:10.1038/s41586-021-03944-y), 2021-09-06
Supplement: 41586_2021_3944_MOESM1_ESM.pdf [file 41586_2021_3944_MOESM1_ESM.pdf]

## Supplementary information

---

# SARS-CoV-2 B.1.617.2 Delta variant replication and immune evasion

---

In the format provided by the authors and unedited
